# Supplementary material for: Community‐Engaged Assessment of Soil Lead Contamination in Atlanta Urban Growing Spaces
Source: PubMed Central journal article supplement — Geohealth. 2023 Mar 24;7(3):e2022GH000674. doi: 10.1029/2022GH000674 (PMC10038125; doi:10.1029/2022gh000674), 2023-03-24
Supplement: GH2-7-e2022GH000674-s001.pdf [file GH2-7-e2022GH000674-s001.pdf]

## Westside Lead Risk Conceptual Site Model

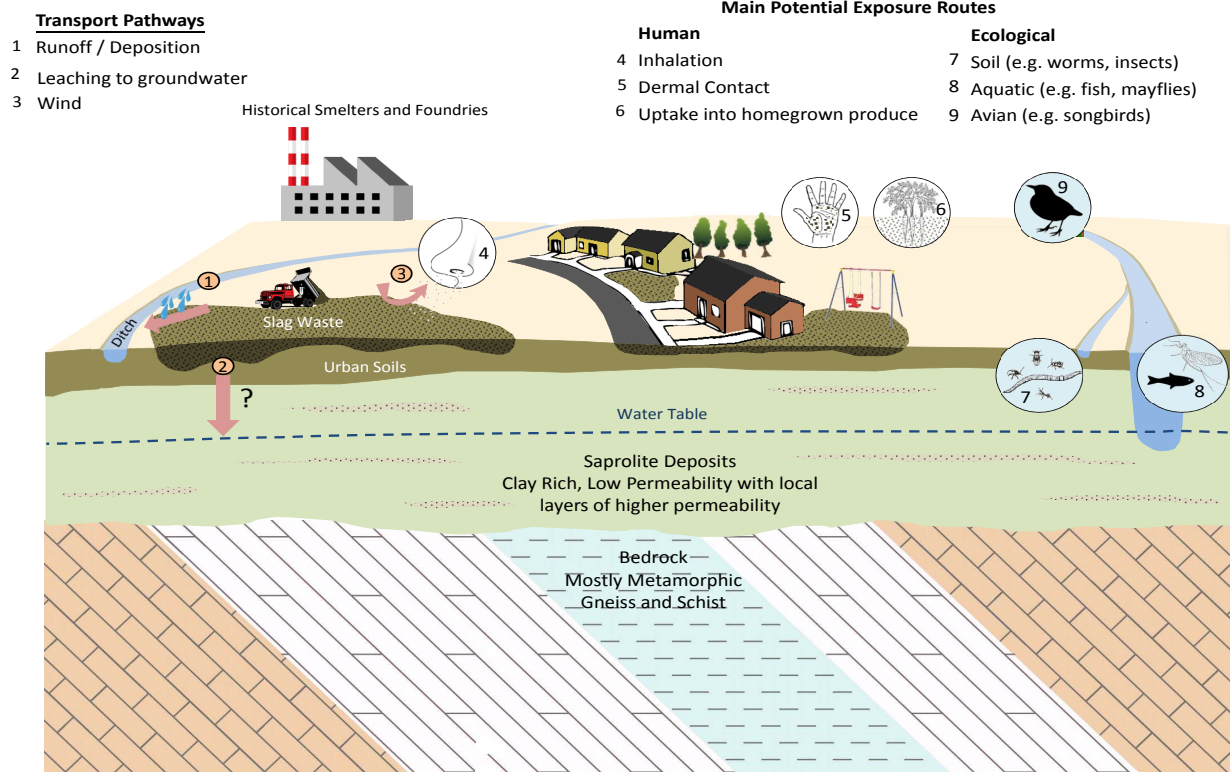

**Figure S1.** Lead Risk Conceptual Site Model for the Westside of Atlanta

Figure courtesy of EPA Region 4.
